# Supplementary material
Source: PubMed Central journal article supplement (PMC2836092)
Supplement: supp_M109.076919_suppfig.pdf [file supp_M109.076919_suppfig.pdf]

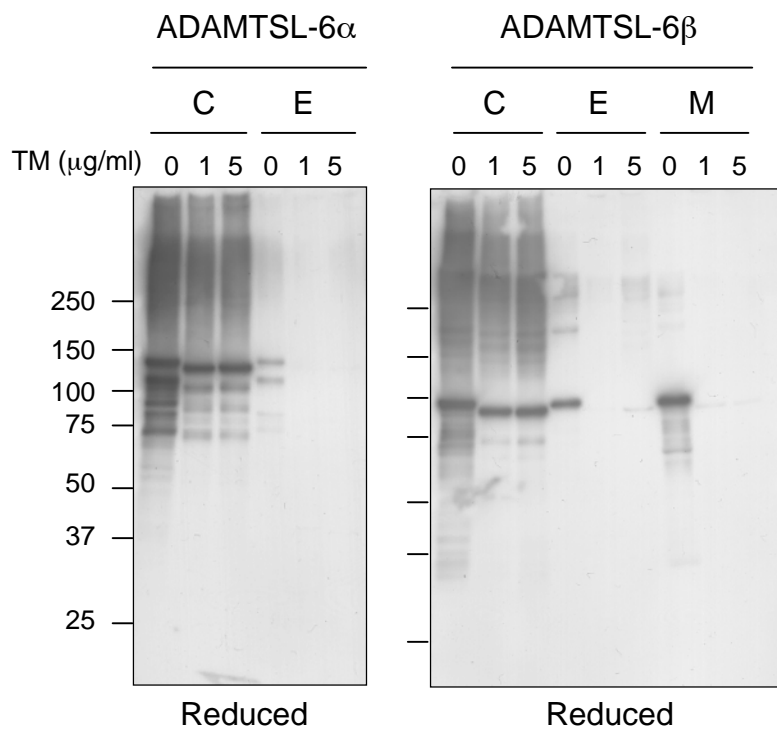

**SUPPLEMENTARY FIGURE S1. ADAMTSL-6 secretion is dependent on N-linked glycosylation.** MG63 cells were transfected with cDNAs encoding ADAMTSL-6 $\alpha$  or -6 $\beta$  and cultured in the presence of the indicated concentrations of tunicamycin (TM) for three days. Cells were fractionated into cell lysates (C), extracellular deposits (E), and spent medium (M), and analyzed by immunoblotting with anti-ADAMTSL-6 antibody under reducing conditions. Positions of molecular mass markers are indicated to the left of the blots. ADAMTSL-6 secretion was inhibited by tunicamycin treatment. Note that the apparent molecular weights of ADAMTSL-6 proteins decreased upon tunicamycin treatment due to the blockade of N-glycosylation.
